# Supplementary material
Source: publisher site journal article supplement (https://www.dovepress.com/get_supplementary_file.php?f=417344.docx)
Supplement: Supplementary file 1 [file get_supplementary_file.php]

# Supplement 1 – Development of the data collection form

A data abstraction form was developed to extract eating challenges and nutrition care interventions recorded by care partners in electronic charts of LTC residents. We used a piecemeal process based on previously described methods,36-39 which consisted of three steps: 1) literature review and clinical scan; 2) refinement of the data abstraction instrument; and 3) consistency check for coding reliability (Suppl Table 1.1).

**Supplementary Table 1.1 Overview of the process and elements of the nutrition care data abstraction form development**

| Phase | Purpose |
| --- | --- |
| 1. Literature review and clinical scan | - Situate the data collection within existing literature - Obtain insight from relevant stakeholders/clinicians familiar with the field - Establish, reinforce, confirm research questions - Identify relevant items to collect, and field-specific terminology for coding consistency |
| 1. Refinement of the data abstraction form | - Apply the preliminary data abstraction form to a handful of charts (n=10) - Modify research questions according to available information - Test feasibility of collecting specified items - Format abstraction form according to organization of charted information - Identify challenges, charting inconsistencies, discrepancies, ambiguity of items etc. - At the end of this phase, the data abstraction form should be in its (nearly) final form finalized for the study |
| 1. Consistency check for reliability of coding over time | - Test the functionality and consistency of the data collection process (n=150) - Further refine item definitions and update codebook when new terms, discrepancies etc. are uncovered - Determine intra-rater reliability (a single rater was responsible for all chart reviews in this case) after three blocks of data collection; 5 randomly selected after every 50 charts to ensure consistency over time (n=15) - Identify “problem” variables |

## Phase 1 – Literature review and clinical scan

Relevant items for inclusion on the form were first identified based on a literature review and personal experience in the LTC dining environment. An initial data abstraction form was developed from these resources. The form included a list of care interventions and practices, eating challenges, and other relevant information (e.g., weight records). The draft form was reviewed by 10 LTC providers: dietitians (n=2), a dietetic intern (n=1), food service workers (n=2), and LTC administrative staff (n=5) from the participating homes who were familiar with providing and documenting nutrition care for LTC residents. These individuals were provided with a summary of the study objectives and an initial draft of the data abstraction form. Upon receipt, they were requested to confirm that the data planned for extraction would address the research objective, and to provide feedback on feasibility of collecting these data from the resident charts.

## Phase 2 – Refinement of the data abstraction form

The initial data abstraction form was used on 10 resident charts, and adjustments were made to the formatting and content according to chart set-up and contents. One major outcome of this phase was the decision to collect the data in four 2-week “bins” representing four timepoints leading up to death (i.e., 6-, 3-, 1-month, and 2 weeks prior to death) (Suppl Figure 1.1). This was done to narrow down the vast amount of information on nutrition and mealtime challenges recorded in the resident charts, and to facilitate aims of our research questions pertaining to longitudinal change in eating challenges and nutrition care leading up to death. Data collection of nutrition care and eating challenge items was simplified such that each item was checked “yes (1)” if it appeared in the care plans/progress notes at the specified timepoint, and the default was “no (0)” if the checkbox was not checked.

The structure of the data abstraction form in relation to the electronic charts was another important consideration of this phase. Intentional organization of the form can minimize data collection errors because it eliminates the need to search for data elements.36 A codebook was also developed to track and define all variables and to provide a list of synonyms and clarifications for each variable to be referenced whenever there were discrepancies. Additions to the codebook were ongoing through the study when decisions had to be made around unclear wording or new terminology. The finalized data abstraction form was formatted using REDCap Software40,41 and all data collection was recorded electronically.


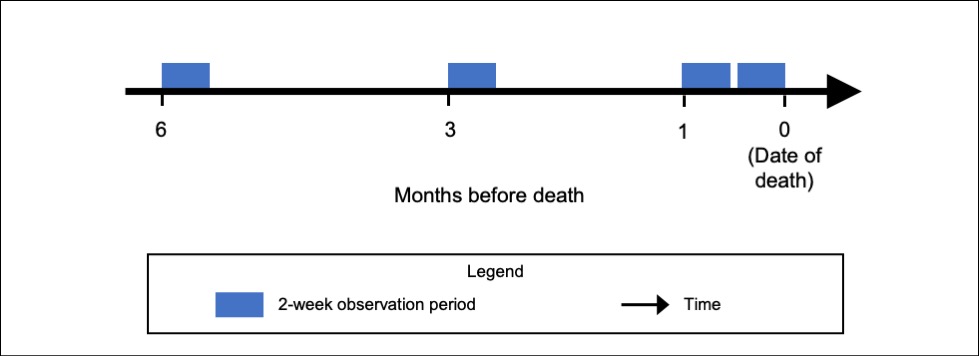


**Supplementary Figure 1.1** **Illustration of observation periods selected for reviewing the resident charts leading up to death.**

## Phase 3 – Consistency check for coding reliability

A single rater (JMK) was responsible for extracting all data from the resident charts, so phase 3 involved ensuring consistency of data collection over time. This was completed in stages. After 50 chart reviews, 10% (n=5) of the charts were randomly selected for a second review. Discrepancies between the two extractions were examined in detail to clarify the inconsistencies and to refine the item definitions in the codebook. The same process was repeated three times, working in 50-chart blocks (i.e., re-reviewed charts were randomly selected from within the most recent block); the third block, after 150 chart reviews, demonstrated good consistency in extraction and further checking in the total sample of 176 records was deemed unnecessary by the research team. Problematic items with a high degree of disagreement and lack of clarity for the rater, were reviewed in all prior charts, such that in the instances where the item was indicated “yes”, the accuracy of the response was confirmed in the resident chart; “no” responses were assumed to be accurate because this suggested that the item was not mentioned in the chart. This more thorough check was necessary for 5 items. In one instance, a significant problem with the way care plans and eating challenge history was recorded led to a restructuring of the question and the first two blocks of charts (n=100) charts were re-evaluated for that item.

There were 293 items on the data abstraction form for comparison, and an additional 5 items reflecting eating challenge history were tested in the last block. Text responses were not included in the reliability analysis but were compared visually for consistency across the two chart reviews and showed general similarities in responses. We assessed the proportion of items that had complete agreement across the 5 re-reviewed charts in each 50-chart block (“total item agreement”). That is, if only 4 of the 5 charts agreed on an item, this item was not in agreement. Total item agreement was assessed by section of the data abstraction form (e.g., care plans, eating challenges etc.) as well as overall across all items (Suppl Table 1.2). We also calculated “overall chart agreement” which was agreement per chart (# agreed / total items) averaged across the 5 charts. We expected to see improvement in agreement from one block to the next with greater experience in extraction and refinement of the codebook. The total item agreement increased from 73% after the first 50 charts, to 86% after the last 50 charts. Overall chart agreement was 93% in the first block up to 97% in the last block.

**Supplementary Table 1.2 Total item and overall chart agreement of each of the test blocks**

| Section | N | Block 1  (after 50 charts) | Block 2  (after 100 charts) | Block 3  (after 150 charts) |
| --- | --- | --- | --- | --- |
| Weight/nutritional status records | 19 | 1.0 | 1.0 | 1.0 |
| Care plans | 27 x 4 a,b | 0.88 | 0.88 | 0.88 |
| Eating challenge history | 5 c | -- | -- | 0.4 |
| Eating challenges (progress notes) | 22 x 4 a | 0.64 | 0.72 | 0.88 |
| Actions taken (progress notes) | 12 x 4 a | 0.52 | 0.65 | 0.67 |
| Palliative care practices | 20 | 0.60 | 0.95 | 0.90 |
| Misc. Dates | 11 | 0.64 | 0.73 | 0.91 |
|  |  |  |  |  |
| Total item agreement d | 293 c | 0.73 | 0.80 | 0.86 |
| Overall chart agreement e | 5 | 0.93 | 0.95 | 0.97 |

a Number of items was multiplied by 4 because these items were collected four times, once per longitudinal wave corresponding to 6 months, 3 months, 1 month, and 2 weeks prior to death.

b One item “no change to care plan” was omitted from the first timepoint (i.e., only collected 3 times), accounting for one less item in the total number of items.

c Items in the “eating challenge history” section were added in the last block of 50 charts so were only reviewed in the last block, making the total number of items 298 in that block.

d Proportion of items that had complete agreement across the 5 re-reviewed charts within each block.

e Proportion of agreement per chart (# agreed / total items) averaged across the 5 charts within each block.

# Supplement 2 – Tables describing the change in status event leading to suspected end-of-life decline

**Supplementary Table 2.1** Process for identifying the change in status event

| Step 1: Date range | Progress Notes tab 🡪 “View All” 🡪 “Custom” 🡪 Select date range beginning at 6 month prior, ending on date of death |
| --- | --- |
| Step 2: Text search (ctrl-F) keywords | Text search (ctrl-F) for “end-of-life”, “end of life”, “EOL”, “end”, “palliative”, “terminal”, “declin”*, “deterior”*, “death”, “dying”, “comfort”, “comfort measures” |
| Step 3: Identify consideration of end-of-life decline | Note the first date any of these are reported if it pertains directly to, or implies suspected end of life; |
| Step 4: Expand search where necessary | If no indication of end-of-life/comfort focus, or indication that management of change of status was already established at 6 months prior to death, the search was expanded by 6 month increments to identify the first mention, or absence, of anticipated end-of-life. |

*****Words intentionally left incomplete to account for various suffixes

**Supplementary Table 2.2** Codes of signs and symptoms noting change in status indicative of potential terminal decline

| Signs and symptoms | Definition with examples extracted from the text |
| --- | --- |
| Nutrition related |  |
| Low food/fluid intake | Any indication that the resident’s intake has decreased, e.g., “poor food intake”, “eating has declined over past month”, “poor appetite” |
| Physical assistance with eating required | Indication that the resident is no longer able to eat independently and requires help , e.g., “resident is no longer able to feed himself”, “requires ++ cuing/assistance to eat”, “difficulty getting food to mouth” |
| Swallowing difficulty | Swallowing difficulty, choking when eating, or formal diagnosis of dysphagia, e.g., “difficulty swallowing”, “dysphagia” |
| Food refusal | Resident refuses to eat or attend one or more meals, resistant to eating, e.g., “often refuses to eat at all”, “keeps resisting/refusing to eat”, “missing more meals”, “several meals refused”, “resistant to eating and drinking”, “routinely declining food” |
| GI symptoms | Any issues or irregularity with the gastrointestinal system, e.g., “sore stomach”, “coffee ground emesis”, “watery stools”, “gastric outlet obstruction”, “rectal bleeding” |
| Poor wound healing | Abnormal and notable skin conditions, e.g., “open and rapidly progressing wound on coccyx”, “worsening skin condition”, “pressure ulcers developing”, “open cancerous wound on hand that will not heal” |
| Weight loss | Noted decreased weight from a previous measurement, e.g., “decreased weight”, “weight loss”, “10% weight loss in past year” |
|  |  |
| Non-nutrition |  |
| Abnormal lab results | Irregular blood or urine samples, e.g., “profound anemia”, “low hemoglobin”, “sodium levels increased”, “hematuria”, “high blood sugars”, “recent blood work indicated malnutrition” |
| Edema | Indication of swelling or fluid retention, e.g., “swelling in face”, “fluid in abdomen”, “diagnosis of pulmonary oedema”, “assessed lower legs, remain edematous”, “fluid retention due to renal insufficiency” |
| Lethargy | Indication that the resident has experienced a decrease in energy, e.g., “increasingly lethargic”, “fatigue”, “resident remains in bed”, “too tired to come to meals”, “longer periods sleeping”, “fatigues quickly”, “very sleepy”, “less energy” |
| General decline | Unspecified deterioration of condition e.g., “overall decline”, “overall deterioration”, “decline over past several months”, “feeling generally unwell”, “decline in condition”, “overall poor”, “frail state”, “more support required” |
| Cognitive decline | Any report of change in cognition, e.g., “cognitive deterioration”, “experiencing confusion”, “increased CPS [cognitive performance scale] score”, “difficulties appropriately responding to environment”, “complications given cognitive state”, “diagnosis of dementia”, “continued decline in mentation”, |
| Delirium | Report of delirium specifically, e.g., “possible palliative delirium”, “delirious” |
| Mental health issue | Any issues with mental health, e.g., “anxiety”, “restless”, “agitated behaviours”, “resistive to care, wandering, insomnia”, “depressed” |
| Pain | Any signs, complaint, or management of pain, e.g., “family informed of increased Dilaudid for pain”, “mouth/face/jaw pain”, “experiencing more pain”, “signs of pain”, “pain meds initiated for resident moaning” |
| Social withdrawal | Note that resident is less engaged in the social life of the home, e.g., “little conversing”, “less engaged in environment”, “not as bright or communicative”, “withdrawn from social life, rarely participates in activities or 1:1 visits”, “seems resident has given up” |
| Resident declined treatment/care | Verbal or non-verbal refusal of offered support, care, or treatment, e.g., “refuses meds”, “resident stated they did not want to go to hospital”, “resistive to care”, “refuses eating assistance” (note: this was not interpreted as food refusal because it was the act of assistance that was noted and not the food itself). |
| Infection | Any indication of an infection, e.g., “UTI”, “sepsis”, “pneumonia”, “meningitis”, “eye infection”, “cellulitis”, “osteomyelitis”, “infected wound” |
| Falls | Reported falls, not necessarily resulting in injury, “noted several recent falls”, “symptoms started with 2 falls”, “increase in falls with poor balance”, “had fall and hit head”, “admitted to hospital due to fall” |
| Injury | Any trauma or damage to bodily tissue, e.g., “fracture”, “recent shin injury”, “had fall and hit head with visible trauma (hematoma and wound)”, |
| Unstable/irregular vitals | Vital signs, including blood pressure, respiratory rate, heart rate, O2 saturation, temperature, outside of normal limits, e.g., “respiratory distress”, “fever”, “low oxygen levels”, “declining lung function”, “low blood pressure”, “irregular heart rate” |
| Cancer | Any mention of cancer, metastases, tumour etc., “cancer”, “metastatic prostate cancer”, “cancerous lumps on ears”, “cancerous lesions”, “metastatic liver disease” |
| Progressive condition | Note of a non-cancer progressive condition that has progressed over a long term, e.g., “COPD”, “renal disease”, “cardiac condition”, “terminal decline due to dementia”, “decreased kidney function”, “advanced Parkinson’s”, “progression of medical conditions” |
| Organ failure | Indication of organ (e.g., heart, kidneys, liver, lungs) failure that may or may not be progressive, e.g., “renal disease”, “complication as result of liver”, “acute renal failure”, “CHF” |
| Sudden decline | Sudden change in status, occurring over several hours or severe decline over one or two days, e.g., “change in condition and severe deterioration in prior day”, “significant decline… possible TIAs”, “rapid decline”, “up and well … checked a short time later he was mostly unresponsive… probably CVA” |

**Supplementary Table 2.3** Frequency of total nutrition-related, non-nutrition, and overall signs and symptoms noted, n=76

|  | Nutrition-related (max. 7) | Non-nutrition related (max. 18) | Total (max. 25) |
| --- | --- | --- | --- |
| Number of reasons cited | % (n) | % (n) | % (n) |
| 0 | 23.7 (18) | 2.6 (2) | 0.0 (0) |
| 1 | 39.5 (30) | 19.7 (15) | 6.6 (5) |
| 2 | 25.0 (19) | 30.3 (23) | 18.4 (14) |
| 3 | 9.2 (7) | 22.4 (17) | 21.0 (16) |
| 4 | 2.6 (2) | 15.8 (12) | 18.4 (14) |
| 5 |  | 4.0 (3) | 17.1 (13) |
| 6 |  | 2.6 (2) | 10.5 (8) |
| 7 |  | 2.6 (2) | 4.0 (3) |
| 8 |  |  | 1.3 (1) |
| 9 |  |  | 1.3 (1) |
| 10 |  |  | 1.3 (1) |

**Note:** blank cells indicate a count of zero (0)
